# Supplementary material for: The Impact of Glucose-Based or Lipid-Based Total Parenteral Nutrition on the Free Fatty Acids Profile in Critically Ill Patients
Source: MDPI journal article supplement (doi:10.3390/nu12051373), 2020-05-11
Supplement: s1 [file s1]

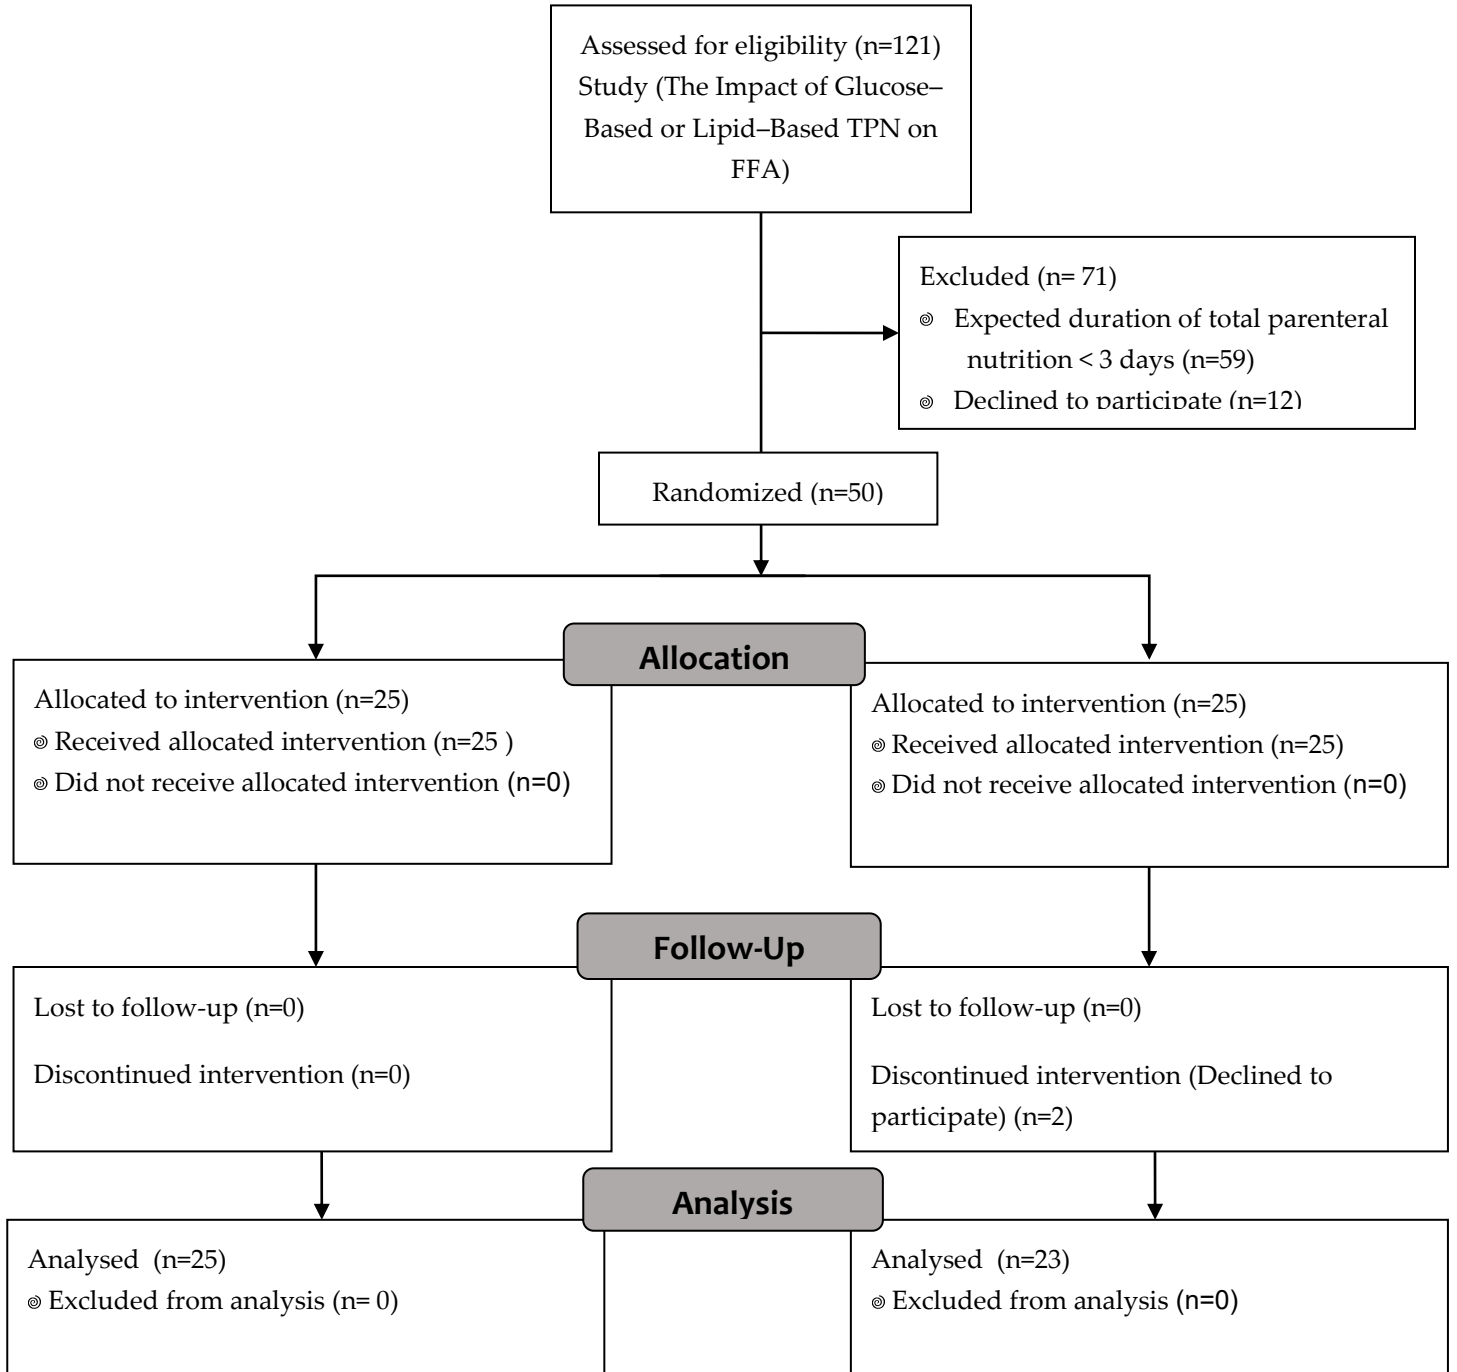

**Figure S1.** Flow diagram for patients enrolled in the study “The Impact of Glucose-Based or Lipid-Based Total Parenteral Nutrition on the Free Fatty Acids Profile in Critically Ill Patient”

**Table S1.** Plasma concentrations of selected hormones of the adipose tissue (Mean values with standard deviations).

| Variable               | Group | Day 0       | Day 1       | Day 3       | Day 6       | Day 9       | Day 14      | Day 28      | <i>p</i> -Value |
|------------------------|-------|-------------|-------------|-------------|-------------|-------------|-------------|-------------|-----------------|
| Resistin               | GG    | 26.94±7.40  | 24.36±9.67  | 24.58±10.08 | 22.08±10.80 | 23.56±10.65 | 24.02±11.42 | 26.02±8.03  | n.s.            |
| (ng·mL <sup>-1</sup> ) | LG    | 20.53±12.27 | 22.78±11.05 | 19.42±11.62 | 21.30±12.13 | 18.35±11.74 | 16.76±11.46 | 23.28±5.31  | n.s.            |
| Leptin                 | GG    | 4.04±3.48   | 14.32±13.69 | 16.69±14.66 | 14.34±12.15 | 16.24±12.41 | 14.05±11.01 | 14.23±9.32  | n.s.            |
| (pg·mL <sup>-1</sup> ) | LG    | 6.77±3.66   | 8.59±6.22   | 6.95±3.97   | 9.13±6.27   | 5.88±4.24   | 3.92±4.21   | 3.92±3.21   | n.s.            |
| PAI-1                  | GG    | 62.84±38.05 | 65.22±41.11 | 57.85±33.86 | 54.19±32.99 | 88.78±47.46 | 68.99±53.40 | 81.99±48.63 | n.s.            |
| (ng·mL <sup>-1</sup> ) | LG    | 52.91±28.06 | 40.91±26.03 | 41.48±28.76 | 47.07±22.12 | 54.65±32.51 | 53.15±30.53 | 40.46±17.01 | n.s.            |

GG = Group G, glucose based total parenteral nutrition; LG = Group L, lipid based total parenteral; PAI-1, plasminogen activator inhibitor-1; n.s., non-significant
